# Supplementary material for: Autoimmune Diseases and Gastric Cancer Risk: A Systematic Review and Meta-Analysis
Source: PubMed Central journal article supplement — Cancer Res Treat. 2019 May 3;51(3):841–50. doi: 10.4143/crt.2019.151 (PMC6639229; doi:10.4143/crt.2019.151), 2019-05-03
Supplement: crt-2019-151-suppl5.pdf [file crt-2019-151-suppl5.pdf]

**S5 Table.** Study quality assessment using Newcastle-Ottawa scale for case-control studies

| First author, year (reference) | Selection                |                             |                       |                        | Comparability of cohorts | Outcome                   |                              |                   | Total score |
|--------------------------------|--------------------------|-----------------------------|-----------------------|------------------------|--------------------------|---------------------------|------------------------------|-------------------|-------------|
|                                | Adequate case definition | Representativeness of cases | Selection of controls | Definition of controls |                          | Ascertainment of exposure | Same method of ascertainment | Non-response rate |             |
| Eriksson, 1981 [15]            | *                        | *                           | -                     | *                      | *                        | -                         | *                            | -                 | 5           |
| Kandemir, 2005 [29]            | *                        | *                           | -                     | *                      | *                        | *                         | *                            | *                 | 7           |
| O'Mara, 1985 [37]              | -                        | -                           | -                     | *                      | *                        | -                         | *                            | -                 | 3           |
| Seo, 2018 [39]                 | -                        | *                           | *                     | -                      | *                        | *                         | *                            | -                 | 5           |

\*Each asterisk represents if individual criterion within the subsection was fulfilled.
