# Supplementary material for: Autoimmune Diseases and Gastric Cancer Risk: A Systematic Review and Meta-Analysis
Source: PubMed Central journal article supplement — Cancer Res Treat. 2019 May 3;51(3):841–50. doi: 10.4143/crt.2019.151 (PMC6639229; doi:10.4143/crt.2019.151), 2019-05-03
Supplement: crt-2019-151-suppl8.pdf [file crt-2019-151-suppl8.pdf]

## Supplementary References

1. Asano J, Watanabe T, Oguchi T, Kanai K, Maruyama M, Ito T, et al. Association between immunoglobulin G4-related disease and malignancy within 12 years after diagnosis: an analysis after longterm followup. *J Rheumatol*. 2015;42:2135-42.
2. Askling J, Linet M, Gridley G, Halstensen TS, Ekstrom K, Ekbom A. Cancer incidence in a population-based cohort of individuals hospitalized with celiac disease or dermatitis herpetiformis. *Gastroenterology*. 2002;123:1428-35.
3. Berkson J, Butt HR, Comfort MW. Occurrence of gastric cancer in persons with achlorhydria and with pernicious anemia. *Proc Staff Meet Mayo Clin*. 1956;31:583-96.
4. Bernatsky S, Ramsey-Goldman R, Labrecque J, Joseph L, Boivin JF, Petri M, et al. Cancer risk in systemic lupus: an updated international multi-centre cohort study. *J Autoimmun*. 2013;42:130-5.
5. Bjorneklett R, Vikse BE, Svarstad E, Aasarod K, Bostad L, Langmark F, et al. Long-term risk of cancer in membranous nephropathy patients. *Am J Kidney Dis*. 2007;50:396-403.
6. Blackburn EK, Callender ST, Dacie JV, Doll R, Girdwood RH, Mollin DL, et al. Possible association between pernicious anaemia and leukaemia: a prospective study of 1,625 patients with a note on the very high incidence of stomach cancer. *Int J Cancer*. 1968;3:163-70.
7. Brinton LA, Gridley G, Hrubec Z, Hoover R, Fraumeni JF Jr. Cancer risk following pernicious anaemia. *Br J Cancer*. 1989;59:810-3.
8. Brito-Zeron P, Kostov B, Fraile G, Caravia-Duran D, Maure B, Rascon FJ, et al. Characterization and risk estimate of cancer in patients with primary Sjogren syndrome. *J Hematol Oncol*. 2017;10:90.
9. Carstensen B, Read SH, Friis S, Sund R, Keskimaki I, Svensson AM, et al. Cancer incidence in persons with type 1 diabetes: a five-country study of 9,000 cancers in type 1 diabetic individuals. *Diabetologia*. 2016;59:980-8.
10. Chang SH, Park JK, Lee YJ, Yang JA, Lee EY, Song YW, et al. Comparison of cancer incidence among patients with rheumatic disease: a retrospective cohort study. *Arthritis Res Ther*. 2014;16:428.
11. Chen YK, Lin CL, Chang YJ, Cheng FT, Peng CL, Sung FC, et al. Cancer risk in patients with Graves' disease: a nationwide cohort study. *Thyroid*. 2013;23:879-84.
12. Collin P, Pukkala E, Reunala T. Malignancy and survival in dermatitis herpetiformis: a comparison with coeliac disease. *Gut*. 1996;38:528-30.
13. Dreyer L, Faurschou M, Mogensen M, Jacobsen S. High incidence of potentially virus-induced malignancies in systemic lupus erythematosus: a long-term followup study in a Danish cohort. *Arthritis Rheum*. 2011;63:3032-7.

14. Elfstrom P, Granath F, Ye W, Ludvigsson JF. Low risk of gastrointestinal cancer among patients with celiac disease, inflammation, or latent celiac disease. *Clin Gastroenterol Hepatol.* 2012;10:30-6.
15. Eriksson S, Clase L, Moquist-Olsson I. Pernicious anemia as a risk factor in gastric cancer. The extent of the problem. *Acta Med Scand.* 1981;210:481-4.
16. Goldacre MJ, Wotton CJ, Yeates D, Seagroatt V, Collier J. Liver cirrhosis, other liver diseases, pancreatitis and subsequent cancer: record linkage study. *Eur J Gastroenterol Hepatol.* 2008;20:384-92.
17. Goldacre MJ, Wotton CJ, Yeates D, Seagroatt V, Jewell D. Cancer in patients with ulcerative colitis, Crohn's disease and coeliac disease: record linkage study. *Eur J Gastroenterol Hepatol.* 2008;20:297-304.
18. Harding JL, Shaw JE, Peeters A, Cartensen B, Magliano DJ. Cancer risk among people with type 1 and type 2 diabetes: disentangling true associations, detection bias, and reverse causation. *Diabetes Care.* 2015;38:264-70.
19. Hashimoto A, Arinuma Y, Nagai T, Tanaka S, Matsui T, Tohma S, et al. Incidence and the risk factor of malignancy in Japanese patients with systemic sclerosis. *Intern Med.* 2012;51:1683-8.
20. Hashimoto A, Chiba N, Tsuno H, Komiya A, Furukawa H, Matsui T, et al. Incidence of malignancy and the risk of lymphoma in Japanese patients with rheumatoid arthritis compared to the general population. *J Rheumatol.* 2015;42:564-71.
21. Hemminki K, Liu X, Ji J, Sundquist J, Sundquist K. Autoimmune disease and subsequent digestive tract cancer by histology. *Ann Oncol.* 2012;23:927-33.
22. Hill CL, Zhang Y, Sigurgeirsson B, Pukkala E, Mellekjær L, Airio A, et al. Frequency of specific cancer types in dermatomyositis and polymyositis: a population-based study. *Lancet.* 2001;357:96-100.
23. Hirano K, Tada M, Sasahira N, Isayama H, Mizuno S, Takagi K, et al. Incidence of malignancies in patients with IgG4-related disease. *Intern Med.* 2014;53:171-6.
24. Hsing AW, Hansson LE, McLaughlin JK, Nyren O, Blot WJ, Ekblom A, et al. Pernicious anemia and subsequent cancer. A population-based cohort study. *Cancer.* 1993;71:745-50.
25. Hsu PC, Lin WH, Kuo TH, Lee HM, Kuo C, Li CY. A population-based cohort study of all-cause and site-specific cancer incidence among patients with type 1 diabetes mellitus in Taiwan. *J Epidemiol.* 2015;25:567-73.
26. Ilus T, Kaukinen K, Virta LJ, Pukkala E, Collin P. Incidence of malignancies in diagnosed celiac patients: a population-based estimate. *Am J Gastroenterol.* 2014;109:1471-7.
27. Ji J, Liu X, Sundquist K, Sundquist J, Hemminki K. Cancer risk in patients hospitalized with polymyalgia rheumatica and giant cell arteritis: a follow-up study in Sweden. *Rheumatology (Oxford).* 2010;49:1158-63.
28. Jorgensen J. The mortality among patients with pernicious anemia in Denmark and the incidence of gastric carcinoma among the same. *Acta Med Scand.* 1951;139:472-81.
29. Kandemir EG, Yonem A, Narin Y. Gastric carcinoma and thyroid status. *J Int Med Res.* 2005;33:222-7.

30. Kokkola A, Sjoblom SM, Haapiainen R, Sipponen P, Puolakkainen P, Jarvinen H. The risk of gastric carcinoma and carcinoid tumours in patients with pernicious anaemia: a prospective follow-up study. *Scand J Gastroenterol.* 1998;33:88-92.
31. Landgren AM, Landgren O, Gridley G, Dores GM, Linet MS, Morton LM. Autoimmune disease and subsequent risk of developing alimentary tract cancers among 4.5 million US male veterans. *Cancer.* 2011;117:1163-71.
32. Lim XR, Gao X, Tan WL, Koh LW, Lian TY, See WQ, et al. Singapore patients with rheumatoid arthritis have a higher incidence of solid-organ malignancies than the general population: findings from the Ttsh Ra Registry. *Ann Rheum Dis.* 2016;75:221-2.
33. Loof L, Adami HO, Sparen P, Danielsson A, Eriksson LS, Hultcrantz R, et al. Cancer risk in primary biliary cirrhosis: a population-based study from Sweden. *Hepatology.* 1994;20:101-4.
34. Mellemkjaer L, Gridley G, Moller H, Hsing AW, Linet MS, Brinton LA, et al. Pernicious anaemia and cancer risk in Denmark. *Br J Cancer.* 1996;73:998-1000.
35. Mosbech J, Videbaek A. Mortality from and risk of gastric carcinoma among patients with pernicious anaemia. *Br Med J.* 1950;2:390-4.
36. Murphy G, Dawsey SM, Engels EA, Ricker W, Parsons R, Etemadi A, et al. Cancer risk after pernicious anemia in the US elderly population. *Clin Gastroenterol Hepatol.* 2015;13:2282-9.e1-4.
37. O'Mara BA, Byers T, Schoenfeld E. Diabetes mellitus and cancer risk: a multisite case-control study. *J Chronic Dis.* 1985;38:435-41.
38. Park JK, Choi IA, Lee EY, Song YW, Lee EB. Incidence of malignancy in Takayasu arteritis in Korea. *Rheumatol Int.* 2014;34:517-21.
39. Seo HM, Han SS, Kim JS. Cancer risks among patients with alopecia areata: a population-based case-control study in Korea. *J Am Acad Dermatol.* 2018;78:209-11.
40. Schafer LW, Larson DE, Melton LJ, 3rd, Higgins JA, Zinsmeister AR. Risk of development of gastric carcinoma in patients with pernicious anemia: a population-based study in Rochester, Minnesota. *Mayo Clin Proc.* 1985;60:444-8.
41. Silano M, Volta U, Mecchia AM, Dessi M, Di Benedetto R, De Vincenzi M, et al. Delayed diagnosis of coeliac disease increases cancer risk. *BMC Gastroenterol.* 2007;7:8.
42. Stockton D, Doherty VR, Brewster DH. Risk of cancer in patients with dermatomyositis or polymyositis, and follow-up implications: a Scottish population-based cohort study. *Br J Cancer.* 2001;85:41-5.
43. Swerdlow AJ, Laing SP, Qiao Z, Slater SD, Burden AC, Botha JL, et al. Cancer incidence and mortality in patients with insulin-treated diabetes: a UK cohort study. *Br J Cancer.* 2005;92:2070-5.

44. Thomas E, Brewster DH, Black RJ, Macfarlane GJ. Risk of malignancy among patients with rheumatic conditions. *Int J Cancer*. 2000;88:497-502.
45. Valent F. Diabetes mellitus and cancer of the digestive organs: an Italian population-based cohort study. *J Diabetes Complications*. 2015;29:1056-61.
46. van Daalen EE, Rahmattulla C, Wolterbeek R, Bruijn JA, Bajema IM. Incidence of malignancy prior to antineutrophil cytoplasmic antibody-associated vasculitis compared to the general population. *J Rheumatol*. 2017;44:314-8.
47. Vannella L, Lahner E, Osborn J, Bordi C, Miglione M, Delle Fave G, et al. Risk factors for progression to gastric neoplastic lesions in patients with atrophic gastritis. *Aliment Pharmacol Ther*. 2010;31:1042-50.
48. Viljamaa M, Kaukinen K, Pukkala E, Hervonen K, Reunala T, Collin P. Malignancies and mortality in patients with coeliac disease and dermatitis herpetiformis: 30-year population-based study. *Dig Liver Dis*. 2006;38:374-80.
49. Weng MY, Huang YT, Liu MF, Lu TH. Incidence of cancer in a nationwide population cohort of 7852 patients with primary Sjogren's syndrome in Taiwan. *Ann Rheum Dis*. 2012;71:524-7.
50. Yamada T, Nakajima A, Inoue E, Tanaka E, Taniguchi A, Momohara S, et al. Incidence of malignancy in Japanese patients with rheumatoid arthritis. *Rheumatol Int*. 2011;31:1487-92.
51. Yoo J, Ahn SS, Jung SM, Song JJ, Park YB, Lee SW. Cancer development in Korean patients with ANCA-associated vasculitis: a single centre study. *Clin Exp Rheumatol*. 2018;36 Suppl 111:73-7.
52. Yu KH, Kuo CF, Huang LH, Huang WK, See LC. Cancer risk in patients with inflammatory systemic autoimmune rheumatic diseases: a nationwide population-based dynamic cohort study in Taiwan. *Medicine (Baltimore)*. 2016;95:e3540.
