# Supplementary figures and images for: Autoimmune Diseases and Gastric Cancer Risk: A Systematic Review and Meta-Analysis
Source: PubMed Central journal article supplement — Cancer Res Treat. 2019 May 3;51(3):841–50. doi: 10.4143/crt.2019.151 (PMC6639229; doi:10.4143/crt.2019.151), 2019-05-03

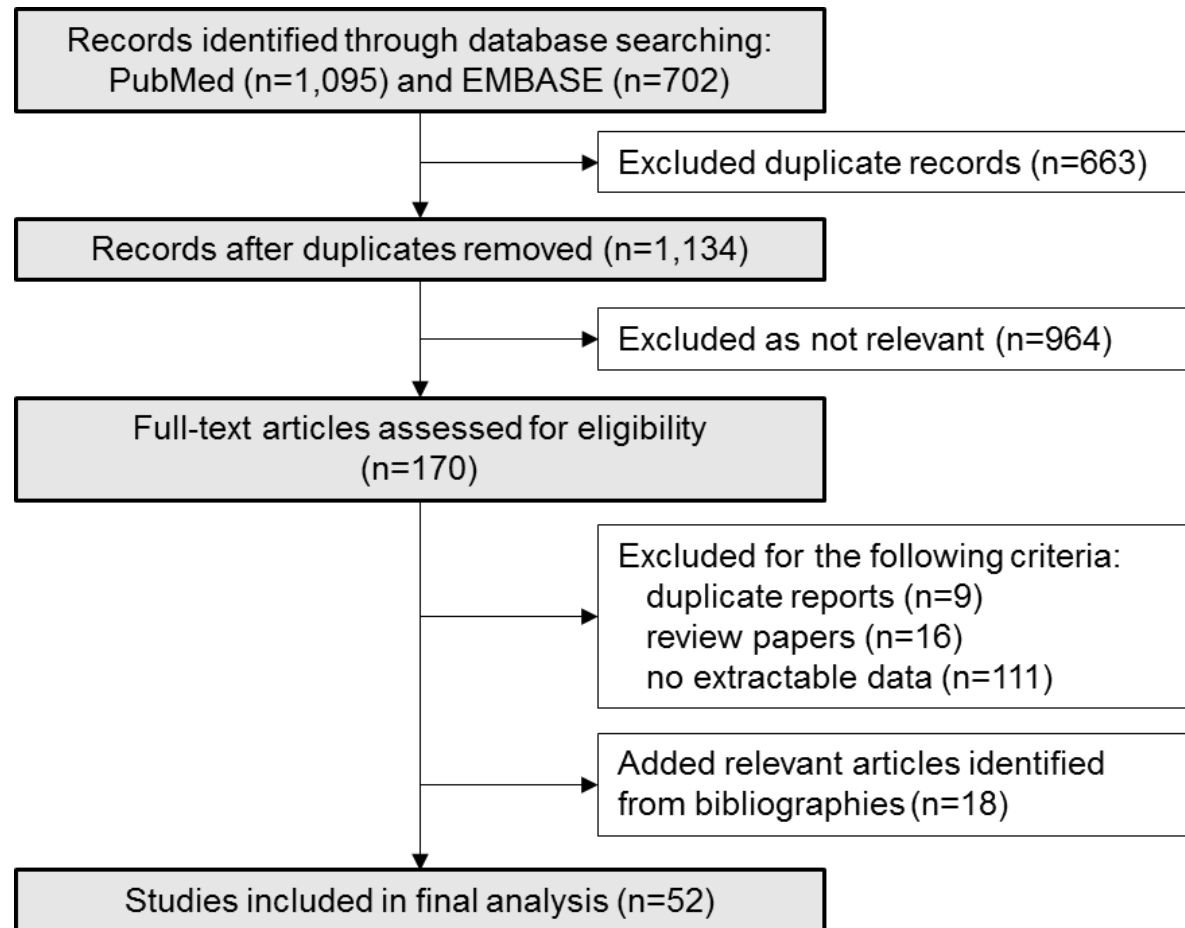

**S6 Fig.** Flow diagram of identification of relevant studies.

Supplement: crt-2019-151-suppl6.pdf [file crt-2019-151-suppl6.pdf]
